# Supplementary material for: Coral bleaching from a nutrient perspective is understudied: A bibliometric survey
Source: Frontiers journal article supplement (doi:10.3389/fmars.2022.926783), 2022-08-02
Supplement: Table_1.DOCX [file Table_1.DOCX]

**Coral bleaching from a nutrient perspective is an understudied area as revealed by a comprehensive bibliometric survey**

Tangcheng Li1*, Jiahong Huang1, Hong Du1, Xiaojuan Liu1, Chongming Zhong1, Senjie Lin2*

1Biology Department and Institute of Marine Sciences, College of Science, Shantou University, Shantou 515063, China;

2Department of Marine Sciences, University of Connecticut, Groton, CT06405, USA.

Corresponding author：

Tangcheng Li; tchli@stu.edu.cn

Senjie Lin; [senjie.lin@uconn.edu](mailto:senjie.lin@uconn.edu);

Running title: bibliometric survey on coral bleaching

**Supplementary**

**
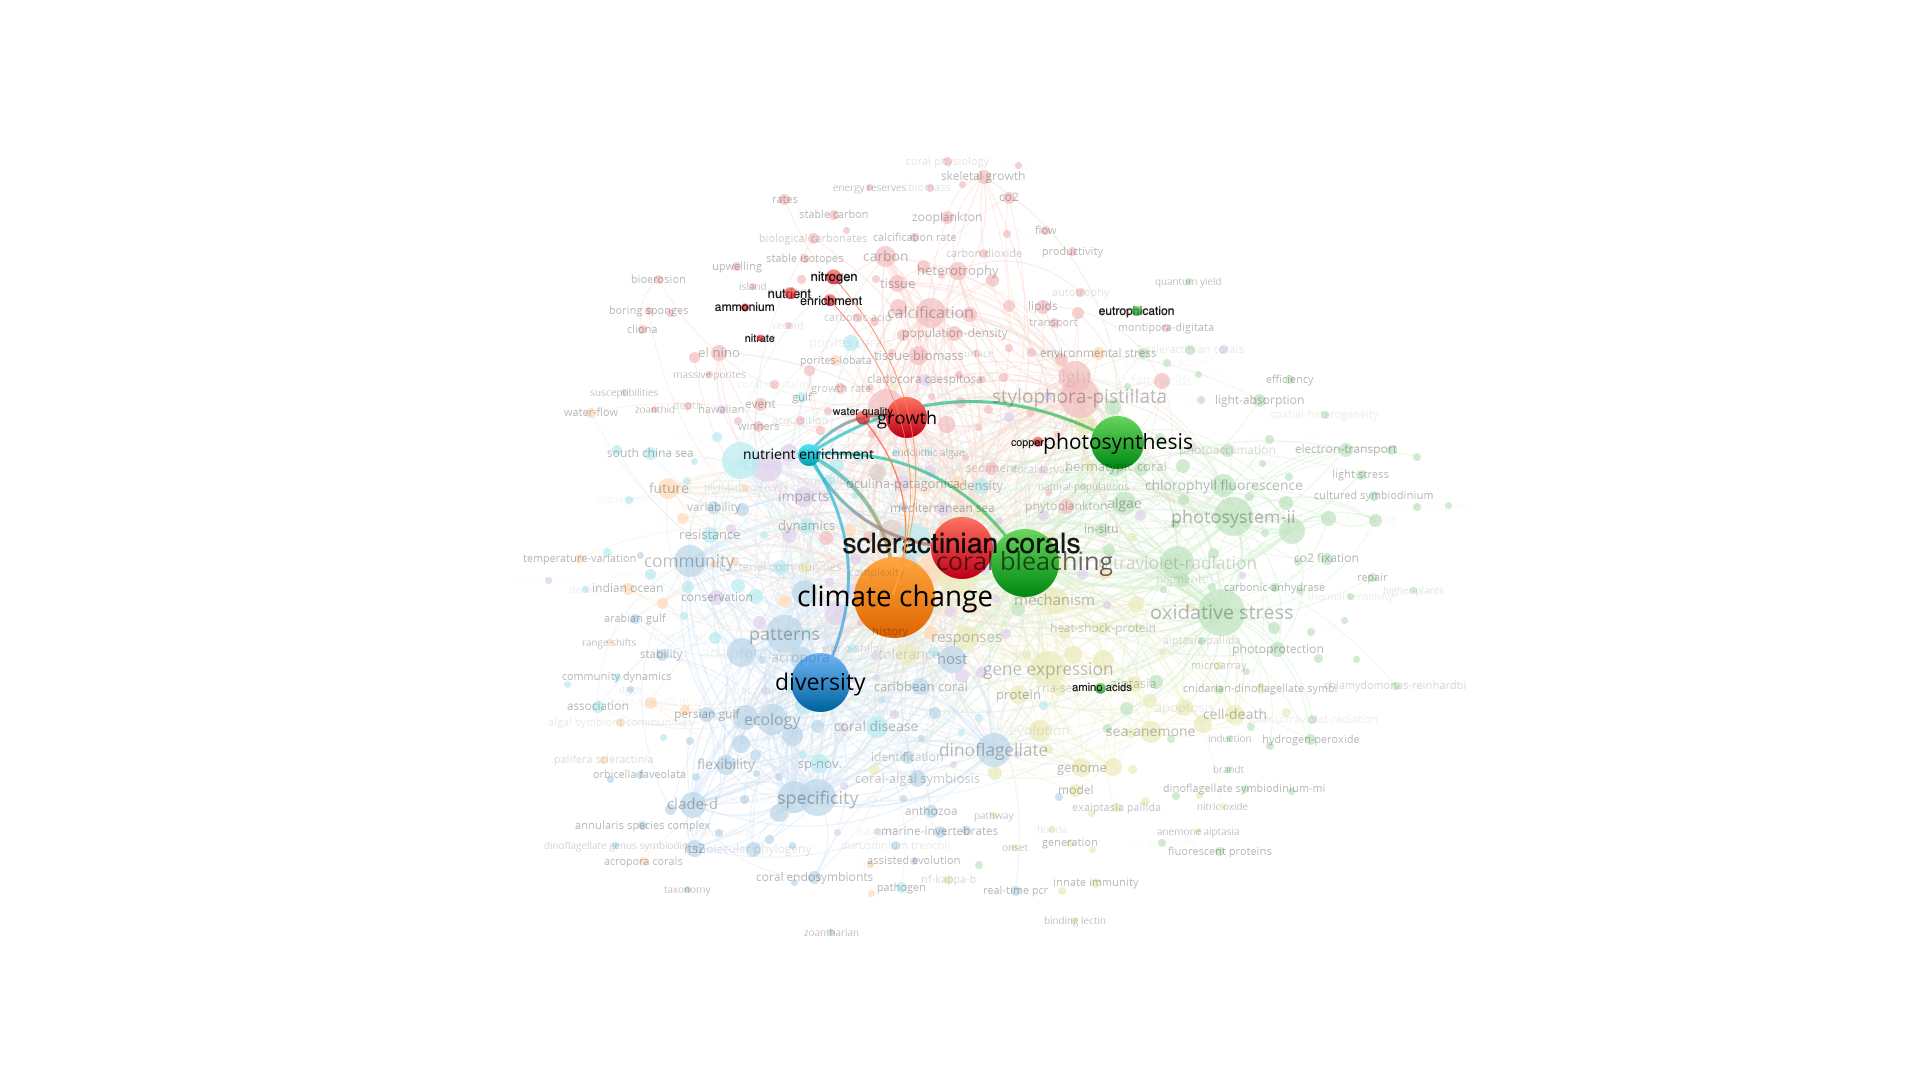
**

Fig. S1. **The highlight co-occurrence map between nutrient and other keywords from combination of coral, Symbiodiniaceae and temperature**. Note: The minimum number of the occurrences of a keyword was set at 5.
